# Supplementary material for: A Primal–Dual Lifting Scheme for Two-Stage Robust Optimization
Source: Atypon-hosted journal article supplement (doi:10.1287/opre.2019.1873), 2020-02-04
Supplement: opre.2019.1873.sm1.pdf [file opre.2019.1873.sm1.pdf]

## A Appendix: Moment Matrices for Common Uncertainty Sets

This appendix elaborates on the calculation of the moment matrix  $\Sigma_A$  in the dual problem  $\underline{\mathcal{P}}(\Xi_S)$ . We first present the moment matrices  $\Sigma_A$  of several commonly used primitive uncertainty sets in Section A.1. Afterwards, Section A.2 shows how a moment matrix changes if particular classes of transformations are applied to an uncertainty set.

### A.1 Primitive Uncertainty Sets

In the following, we list the moment matrices  $\Sigma_A$  of several commonly used primitive uncertainty sets. Since the derivations are basic but tedious, we omit them for the sake of brevity. In the following, we denote by  $\lfloor x \rfloor$  and  $\lceil x \rceil$  the largest (smallest) integer less than or equal to (larger than or equal to)  $x \in \mathbb{R}$ .

#### A.1.1 1-Norm Ball Uncertainty Sets

For a 1-norm ball uncertainty set of the form

$$\Xi = \left\{ \boldsymbol{\xi} \in \mathbb{R}^k : \|\boldsymbol{\xi}\|_1 \leq 1 \right\},$$

the set of extreme points satisfies

$$\text{ext} \left\{ \boldsymbol{\xi} \in \mathbb{R}^k : \|\boldsymbol{\xi}\|_1 \leq 1 \right\} = \text{ext} \left\{ \boldsymbol{\xi} \in \mathbb{R}^k : \sum_{i=1}^k |\xi_i| \leq 1 \right\} = \left\{ \pm \mathbf{e}_i \in \mathbb{R}^k : i = 1, \dots, k \right\},$$

and we therefore obtain the moment matrix

$$\Sigma_A = \begin{pmatrix} 2k & \mathbf{0}^\top \\ \mathbf{0} & 2 \cdot \mathbf{I} \end{pmatrix}.$$

#### A.1.2 $\infty$ -Norm Ball Uncertainty Sets

We now consider an  $\infty$ -norm ball uncertainty set of the form

$$\Xi = \left\{ \boldsymbol{\xi} \in \mathbb{R}^k : \|\boldsymbol{\xi}\|_\infty \leq 1 \right\}.$$

Uncertainty sets of this type are commonly employed to describe the demand in operations management applications [8, 34] or when the uncertainty underlying the parameters  $\boldsymbol{\xi}$  is described by a factor model [35]. The set of extreme points satisfies

$$\text{ext} \left\{ \boldsymbol{\xi} \in \mathbb{R}^k : \|\boldsymbol{\xi}\|_\infty \leq 1 \right\} = \text{ext} \left\{ \boldsymbol{\xi} \in \mathbb{R}^k : \max_{i=1,\dots,k} |\xi_i| \leq 1 \right\} = \{-1, 1\}^k,$$

and we therefore obtain the moment matrix

$$\boldsymbol{\Sigma}_A = \begin{pmatrix} 2^k & \mathbf{0}^\top \\ \mathbf{0} & 2^k \cdot \mathbf{I} \end{pmatrix}.$$

### A.1.3 $(1 \cap \infty)$ -Norm Ball Uncertainty Sets

We now consider an uncertainty set that emerges from the intersection of a scaled 1-norm ball and an  $\infty$ -norm ball:

$$\Xi = \left\{ \boldsymbol{\xi} \in \mathbb{R}^k : \|\boldsymbol{\xi}\|_1 \leq \kappa, \|\boldsymbol{\xi}\|_\infty \leq 1 \right\}$$

For  $\kappa \leq 1$  and  $\kappa \geq k$ , the uncertainty set reduces to a scaled 1-norm ball and an  $\infty$ -norm ball, respectively. We therefore assume that  $\kappa \in (1, k)$ . Uncertainty sets of this type are commonly used as polyhedral outer approximations of ellipsoidal uncertainty sets [29, 35].

If  $\kappa \in \mathbb{N}$ , we obtain the moment matrix

$$\boldsymbol{\Sigma}_A = \begin{pmatrix} 2^\kappa \binom{k}{\kappa} & \mathbf{0}^\top \\ \mathbf{0} & 2^\kappa \binom{k-1}{\kappa-1} \cdot \mathbf{I} \end{pmatrix}.$$

For fractional  $\kappa$ , on the other hand, the moment matrix is

$$\boldsymbol{\Sigma}_A = \begin{pmatrix} 2^{\lceil \kappa \rceil} \binom{k}{\lceil \kappa \rceil} & \mathbf{0}^\top \\ \mathbf{0} & 2^{\lceil \kappa \rceil} \binom{k-1}{\lceil \kappa \rceil} (\lfloor \kappa \rfloor + (\kappa - \lfloor \kappa \rfloor)^2) \cdot \mathbf{I} \end{pmatrix}.$$

### A.1.4 Budget Uncertainty Sets

We next consider a budget uncertainty set of the form

$$\Xi = \left\{ \boldsymbol{\xi} \in [0, 1]^k : \mathbf{e}^\top \boldsymbol{\xi} \leq B \right\},$$

where  $B \in \mathbb{N}_0$ . Note that  $B = 0$  and  $B \geq k$  correspond to the cases  $\Xi = \{\mathbf{0}\}$  and  $\Xi = [0, 1]^k$  (the latter being a translation of the  $\infty$ -norm ball, which can be calculated using the results of Section A.1.2 and the transformations from Section A.2) and can therefore be omitted. Budget uncertainty sets have been popularized by [21] and have since been applied widely across domains.

For  $B \in \{1, \dots, k-1\}$ , the moment matrix is

$$\Sigma_A = \begin{pmatrix} \sum_{i=0}^B \binom{k}{i} & \left[ \sum_{i=0}^{B-1} \binom{k-1}{i} \right] \cdot \mathbf{e}^\top \\ \left[ \sum_{i=0}^{B-1} \binom{k-1}{i} \right] \cdot \mathbf{e} & \left[ \sum_{i=0}^{B-1} \binom{k-1}{i} - \sum_{i=0}^{B-2} \binom{k-2}{i} \right] \cdot \mathbf{I} + \left[ \sum_{i=0}^{B-2} \binom{k-2}{i} \right] \cdot \mathbf{e}\mathbf{e}^\top \end{pmatrix}.$$

### A.1.5 Central Limit Theorem-Type Uncertainty Sets

We finally consider a central limit theorem-type uncertainty set of the form

$$\Xi = \left\{ \boldsymbol{\xi} \in [-1, 1]^k : -\Gamma \leq |\mathbf{e}^\top \boldsymbol{\xi}| \leq +\Gamma \right\},$$

where  $\Gamma \in (0, k)$  [7]. In this case, we have  $|\text{ext } \Xi| = \eta_1 + \eta_2 + \eta_3$ , where

$$\eta_1 = \begin{cases} \binom{k}{\frac{k}{2}} + 2 \sum_{i=1}^{\lfloor \frac{\Gamma}{2} \rfloor} \binom{k}{\frac{k}{2} + i} & \text{if } k \text{ is even,} \\ 2 \sum_{i=0}^{\lfloor \frac{\Gamma-1}{2} \rfloor} \binom{k}{\frac{k+1}{2} + i} & \text{if } k \text{ is odd;} \end{cases}$$

$$\eta_2 = \begin{cases} 2k \binom{k-1}{\frac{k+\Gamma-1}{2}} & \text{if } k \text{ is even and } \Gamma \text{ is odd, or vice versa,} \\ 0 & \text{otherwise;} \end{cases}$$

$$\eta_3 = \begin{cases} 2 \binom{k}{\frac{k}{2} + \lfloor \frac{\Gamma}{2} \rfloor} \cdot \left( \frac{k}{2} - \left\lfloor \frac{\Gamma}{2} \right\rfloor \right) & \text{if } k \text{ is even and } \Gamma \text{ is fractional,} \\ 2 \binom{k}{\frac{k+1}{2} + \lfloor \frac{\Gamma-1}{2} \rfloor} \cdot \left( \frac{k-1}{2} - \left\lfloor \frac{\Gamma-1}{2} \right\rfloor \right) & \text{if } k \text{ is odd and } \Gamma \text{ is fractional,} \\ 0 & \text{otherwise.} \end{cases}$$

Due to the symmetry of  $\Xi$ , the sum of first moments satisfies  $\sum_{\xi \in \text{ext } \Xi} \xi = \mathbf{0}$ . The sum of second moments, finally, satisfies  $\sum_{\xi \in \text{ext } \Xi} \xi \xi^\top = \omega \cdot (\mathbf{e} \mathbf{e}^\top) + (\delta - \omega) \cdot \mathbf{I}$ , where  $\delta = \delta_1 + \delta_2 + \delta_3$  with

$$\delta_1 = \begin{cases} \binom{k}{\frac{k}{2}} + 2 \sum_{i=1}^{\lfloor \frac{\Gamma}{2} \rfloor} \binom{k}{\frac{k}{2} + i} & \text{if } k \text{ is even,} \\ 2 \sum_{i=0}^{\lfloor \frac{\Gamma-1}{2} \rfloor} \binom{k}{\frac{k+1}{2} + i} & \text{if } k \text{ is odd;} \end{cases}$$

$$\delta_2 = \begin{cases} 2(k-1) \binom{k-1}{\frac{k+\Gamma-1}{2}} & \text{if } k \text{ is even and } \Gamma \text{ is odd, or vice versa,} \\ 0 & \text{otherwise;} \end{cases}$$

$$\delta_3 = \begin{cases} 2 \binom{k}{\frac{k}{2} + \lfloor \frac{\Gamma}{2} \rfloor} \binom{k}{\frac{k}{2} - \lfloor \frac{\Gamma}{2} \rfloor} \left[ \frac{k-1}{k} + \frac{1}{k} \cdot \left( 1 - \left[ \Gamma - 2 \lfloor \frac{\Gamma}{2} \rfloor \right] \right)^2 \right] & \text{if } k \text{ is even and} \\ & \Gamma \text{ is fractional,} \\ 2 \binom{k}{\frac{k+1}{2} + \lfloor \frac{\Gamma-1}{2} \rfloor} \binom{k}{\frac{k-1}{2} - \lfloor \frac{\Gamma-1}{2} \rfloor} \left[ \frac{k-1}{k} + \frac{1}{k} \cdot \left( 2 - \Gamma + 2 \lfloor \frac{\Gamma-1}{2} \rfloor \right)^2 \right] & \text{if } k \text{ is odd and} \\ & \Gamma \text{ is fractional,} \\ 0 & \text{otherwise,} \end{cases}$$

as well as  $\omega = \omega_1 + \omega_2 + \omega_3$  with

$$\omega_1 = \begin{cases} 2 \sum_{i=\max\{2-\frac{k}{2}, -\lfloor \frac{\Gamma}{2} \rfloor\}}^{\min\{\frac{k}{2}, \lfloor \frac{\Gamma}{2} \rfloor\}} \binom{k-2}{\frac{k}{2} + i - 2} - 2 \sum_{i=\max\{1-\frac{k}{2}, -\lfloor \frac{\Gamma}{2} \rfloor\}}^{\min\{\frac{k}{2}-1, \lfloor \frac{\Gamma}{2} \rfloor\}} \binom{k-2}{\frac{k}{2} + i - 1} & \text{if } k \text{ is even,} \\ 2 \sum_{i=\max\{\frac{1}{2}-\frac{k}{2}, -\lfloor \frac{\Gamma-1}{2} \rfloor-2\}}^{\min\{\frac{k}{2}-\frac{3}{2}, \lfloor \frac{\Gamma-1}{2} \rfloor-1\}} \binom{k-2}{\frac{k-1}{2} + i} - 2 \sum_{i=\max\{\frac{1}{2}-\frac{k}{2}, -\lfloor \frac{\Gamma-1}{2} \rfloor-1\}}^{\min\{\frac{k}{2}-\frac{3}{2}, \lfloor \frac{\Gamma-1}{2} \rfloor\}} \binom{k-2}{\frac{k-1}{2} + i} & \text{if } k \text{ is odd;} \end{cases}$$

$\omega_2 = \omega_{21} + \omega_{22} + \omega_{23}$  if  $k$  is even and  $\Gamma$  is odd, or vice versa, and  $\omega_2 = 0$  otherwise, where

$$\omega_{21} = \begin{cases} 2(k-2) \binom{k-3}{\frac{k+\Gamma-5}{2}} & \text{if } k + \Gamma \geq 5, k \geq \Gamma + 1, \\ 0 & \text{otherwise;} \end{cases}$$

$$\omega_{22} = \begin{cases} 2(k-2) \binom{k-3}{\frac{k-\Gamma-5}{2}} & \text{if } k \geq \Gamma + 5, \\ 0 & \text{otherwise;} \end{cases} \quad \omega_{23} = \begin{cases} -4 \cdot (k-2) \binom{k-3}{\frac{k+\Gamma-3}{2}} & \text{if } k \geq \Gamma + 3, \\ 0 & \text{otherwise;} \end{cases}$$

and finally  $\omega_3 = \omega_{31} - \omega_{32} + \omega_{33} - \omega_{34}$  if  $k$  is even and  $\Gamma$  is fractional, where

$$\omega_{31} = \begin{cases} 2 \binom{k-2}{\frac{k}{2} + \lfloor \frac{\Gamma}{2} \rfloor - 2} \cdot \left( \frac{k}{2} - \lfloor \frac{\Gamma}{2} \rfloor \right) + 2 \binom{k-2}{\frac{k}{2} - \lfloor \frac{\Gamma}{2} \rfloor - 2} \cdot \left( \frac{k}{2} - \lfloor \frac{\Gamma}{2} \rfloor - 2 \right) & \text{if } \frac{k}{2} \geq \lfloor \frac{\Gamma}{2} \rfloor + 2, \\ 0 & \text{otherwise;} \end{cases}$$

$$\omega_{32} = 4 \binom{k-2}{\frac{k}{2} + \lfloor \frac{\Gamma}{2} \rfloor - 1} \cdot \left( \frac{k}{2} - \lfloor \frac{\Gamma}{2} \rfloor - 1 \right);$$

$$\omega_{33} = \begin{cases} 4 \binom{k-2}{\frac{k}{2} - \lfloor \frac{\Gamma}{2} \rfloor - 2} & \text{if } \frac{k}{2} \geq \lfloor \frac{\Gamma}{2} \rfloor + 2, \\ 0 & \text{otherwise;} \end{cases} \quad \omega_{34} = \begin{cases} 4 \binom{k-2}{\frac{k}{2} - \lfloor \frac{\Gamma}{2} \rfloor - 1} & \text{if } \frac{k}{2} \geq \lfloor \frac{\Gamma}{2} \rfloor + 1, \\ 0 & \text{otherwise;} \end{cases}$$

as well as  $\omega_3 = \omega_{35} + \omega_{36} - \omega_{37} + \omega_{38} - \omega_{39}$  if  $k$  is odd and  $\Gamma$  is fractional, where

$$\omega_{35} = \begin{cases} 2 \binom{k-2}{\frac{k-3}{2} + \lfloor \frac{\Gamma-1}{2} \rfloor} \cdot \left( \frac{k-1}{2} - \lfloor \frac{\Gamma-1}{2} \rfloor \right) & \text{if } \frac{k-1}{2} \geq \lfloor \frac{\Gamma-1}{2} \rfloor, \\ 0 & \text{otherwise;} \end{cases}$$

$$\omega_{36} = \begin{cases} 2 \binom{k-2}{\frac{k-5}{2} - \lfloor \frac{\Gamma-1}{2} \rfloor} \cdot \left( \frac{k-5}{2} - \lfloor \frac{\Gamma-1}{2} \rfloor \right) & \text{if } \frac{k-5}{2} \geq \lfloor \frac{\Gamma-1}{2} \rfloor, \\ 0 & \text{otherwise;} \end{cases}$$

$$\omega_{37} = \begin{cases} 4 \binom{k-2}{\frac{k-1}{2} + \lfloor \frac{\Gamma-1}{2} \rfloor} \cdot \left( \frac{k-3}{2} - \lfloor \frac{\Gamma-1}{2} \rfloor \right) & \text{if } \frac{k-3}{2} \geq \lfloor \frac{\Gamma-1}{2} \rfloor, \\ 0 & \text{otherwise;} \end{cases}$$

$$\omega_{38} = \begin{cases} 4 \binom{k-2}{\frac{k-5}{2} - \lfloor \frac{\Gamma-1}{2} \rfloor} & \text{if } \frac{k-5}{2} \geq \lfloor \frac{\Gamma-1}{2} \rfloor, \\ 0 & \text{otherwise;} \end{cases} \quad \omega_{39} = \begin{cases} 4 \binom{k-2}{\frac{k-3}{2} - \lfloor \frac{\Gamma-1}{2} \rfloor} & \text{if } \frac{k-3}{2} \geq \lfloor \frac{\Gamma-1}{2} \rfloor, \\ 0 & \text{otherwise.} \end{cases}$$

## A.2 Transformations of Primitive Uncertainty Sets

In the following, we show how a moment matrix  $\Sigma_A$  for an uncertainty set  $\Xi$  changes if  $\Xi$  is transformed by an injective affine map, or if  $\Xi$  is composed of the cross product of primitive uncertainty sets  $\Xi_i$  with known moment matrices  $\Sigma_{A,i}$ .

### A.2.1 Injective Affine Maps

It follows from Theorem 9.2.3 in [48] that extreme points are preserved under injective affine maps.

Let us assume that  $\Xi' = f(\Xi)$  for an injective affine map  $f : \mathbb{R}^k \xrightarrow{A} \mathbb{R}^{k'}$ . We then obtain that

$$\Sigma'_A = \begin{pmatrix} |\text{ext } \Xi| & \sum_{\xi \in \text{ext } \Xi} f(\xi)^\top \\ \sum_{\xi \in \text{ext } \Xi} f(\xi) & \sum_{\xi \in \text{ext } \Xi} f(\xi)f(\xi)^\top \end{pmatrix}.$$

Let us now additionally assume that  $f(\xi) = \mathbf{F}\xi + \mathbf{f}$ . From the previous assumption that  $f$  is injective, we conclude that the matrix  $\mathbf{F}$  has full column rank. We then have

$$\sum_{\xi \in \text{ext } \Xi} f(\xi) = \sum_{\xi \in \text{ext } \Xi} (\mathbf{F}\xi + \mathbf{f}) = \mathbf{F} \left[ \sum_{\xi \in \text{ext } \Xi} \xi \right] + \mathbf{f} + |\text{ext } \Xi| \mathbf{f}.$$

In other words, we can calculate  $\sum_{\xi \in \text{ext } \Xi} f(\xi)$  efficiently from the quantities  $|\text{ext } \Xi|$  and  $\sum_{\xi \in \text{ext } \Xi} \xi$ .

In a similar way, we obtain that

$$\begin{aligned} \sum_{\xi \in \text{ext } \Xi} f(\xi)f(\xi)^\top &= \sum_{\xi \in \text{ext } \Xi} (\mathbf{F}\xi + \mathbf{f})(\mathbf{F}\xi + \mathbf{f})^\top = \left( \mathbf{F} \left[ \sum_{\xi \in \text{ext } \Xi} \xi \right] \mathbf{f}^\top + \left[ \mathbf{F} \left[ \sum_{\xi \in \text{ext } \Xi} \xi \right] \mathbf{f}^\top \right]^\top \right) \\ &\quad + \mathbf{F} \left[ \sum_{\xi \in \text{ext } \Xi} \xi \xi^\top \right] \mathbf{F}^\top + |\text{ext } \Xi| \mathbf{f} \mathbf{f}^\top. \end{aligned}$$

In other words, we can calculate  $\sum_{\xi \in \text{ext } \Xi} f(\xi)f(\xi)^\top$  efficiently from the quantities  $|\text{ext } \Xi|$ ,  $\sum_{\xi \in \text{ext } \Xi} \xi$  and  $\sum_{\xi \in \text{ext } \Xi} \xi \xi^\top$ .

### A.2.2 Cross Products

Assume that  $\Xi = \Xi_1 \times \Xi_2$  with  $\Xi_1 \subseteq \mathbb{R}^{k_1}$  and  $\Xi_2 \subseteq \mathbb{R}^{k_2}$  such that  $k_1 + k_2 = k$ . We then have

$$|\text{ext } \Xi| = |\text{ext } \Xi_1| \cdot |\text{ext } \Xi_2|,$$

$$\sum_{\xi \in \text{ext } \Xi} \xi = \begin{pmatrix} |\text{ext } \Xi_2| \cdot \sum_{\xi_1 \in \text{ext } \Xi_1} \xi_1 \\ |\text{ext } \Xi_1| \cdot \sum_{\xi_2 \in \text{ext } \Xi_2} \xi_2 \end{pmatrix},$$

$$\sum_{\xi \in \text{ext } \Xi} \xi \xi^\top = \begin{pmatrix} |\text{ext } \Xi_2| \cdot \sum_{\xi_1 \in \text{ext } \Xi_1} \xi_1 \xi_1^\top & \begin{pmatrix} \sum_{\xi_1 \in \text{ext } \Xi_1} \xi_1 \\ \sum_{\xi_2 \in \text{ext } \Xi_2} \xi_2 \end{pmatrix} \begin{pmatrix} \sum_{\xi_2 \in \text{ext } \Xi_2} \xi_2 \\ \sum_{\xi_1 \in \text{ext } \Xi_1} \xi_1 \end{pmatrix}^\top \\ \begin{pmatrix} \sum_{\xi_2 \in \text{ext } \Xi_2} \xi_2 \\ \sum_{\xi_1 \in \text{ext } \Xi_1} \xi_1 \end{pmatrix} \begin{pmatrix} \sum_{\xi_1 \in \text{ext } \Xi_1} \xi_1 \\ \sum_{\xi_2 \in \text{ext } \Xi_2} \xi_2 \end{pmatrix}^\top & |\text{ext } \Xi_1| \cdot \sum_{\xi_2 \in \text{ext } \Xi_2} \xi_2 \xi_2^\top \end{pmatrix}.$$

In other words, we can calculate  $|\text{ext } \Xi|$ ,  $\sum_{\xi \in \text{ext } \Xi} \xi$  and  $\sum_{\xi \in \text{ext } \Xi} \xi \xi^\top$  efficiently from the quantities  $|\text{ext } \Xi_i|$ ,  $\sum_{\xi \in \text{ext } \Xi_i} \xi$  and  $\sum_{\xi \in \text{ext } \Xi_i} \xi \xi^\top$ ,  $i = 1, 2$ .
